# Supplementary material
Source: PubMed Central journal article supplement (PMC9088623)
Supplement: JMV-94-3421-s001.pdf [file JMV-94-3421-s001.pdf]

We gratefully acknowledge the following Authors from the Originating laboratories responsible for obtaining the specimens, as well as the Submitting laboratories where the genome data were generated and shared via GISAID, on which this research is based.

All Submitters of data may be contacted directly via [www.gisaid.org](http://www.gisaid.org)

Authors are sorted alphabetically.

Acknowledgement EPI\_SET Identifier: EPI\_SET\_20220317mv

| Accession ID                                                                                                                                                                                                                                                  | Originating Laboratory                                                                                   | Submitting Laboratory                                                                                                                                                                                              | Authors                                                                                                                                                                                                                                                                                                            |
|---------------------------------------------------------------------------------------------------------------------------------------------------------------------------------------------------------------------------------------------------------------|----------------------------------------------------------------------------------------------------------|--------------------------------------------------------------------------------------------------------------------------------------------------------------------------------------------------------------------|--------------------------------------------------------------------------------------------------------------------------------------------------------------------------------------------------------------------------------------------------------------------------------------------------------------------|
| EPI_ISL_8439588                                                                                                                                                                                                                                               | AMPATH                                                                                                   | National Institute for Communicable Diseases of the National Health Laboratory Service                                                                                                                             | Amoako DG; Bhiman JN; Everatt J; Ismail A; Kekana D; Mahlangu B; Mnguni A; Mohale T; Ntuli N; Scheepers C; Wolter N                                                                                                                                                                                                |
| EPI_ISL_9175930                                                                                                                                                                                                                                               | BBMP- West                                                                                               | inStem, NCBS-INSACOG                                                                                                                                                                                               | Aswin SaiNarain; Dasaradhi Palakodeti; Uma Ramakrishnan                                                                                                                                                                                                                                                            |
| EPI_ISL_9322111, EPI_ISL_9352673                                                                                                                                                                                                                              | BIOMNIS LYON                                                                                             | CNR Virus des Infections Respiratoires - France SUD                                                                                                                                                                | Antonin Bal; Bruno Lina; Bruno Simon; Gregory Destras; Gwendolyne Burfin; Hadrien Regue; Laurence Josset; Martine Valette; Quentin Semanas; ThÃ©ophile Boyer; ThÃ©ophile Boyer                                                                                                                                     |
| EPI_ISL_9322113                                                                                                                                                                                                                                               | CENTRE HOSPITALIER                                                                                       | CNR Virus des Infections Respiratoires - France SUD                                                                                                                                                                | Antonin Bal; Bruno Lina; Bruno Simon; Gregory Destras; Gwendolyne Burfin; Hadrien Regue; Laurence Josset; Martine Valette; Quentin Semanas; ThÃ©ophile Boyer                                                                                                                                                       |
| EPI_ISL_9257743, EPI_ISL_9257744, EPI_ISL_9257745                                                                                                                                                                                                             | CERBALLIANCE PARIS ET IDF EST                                                                            | CERBA HealthCare                                                                                                                                                                                                   | BÃ©nÃ©dicte Roquebert; Laura Verdurme; Mathilde Roussel; Sabine Trombert; StÃ©phanie Haim-Boukobza                                                                                                                                                                                                                 |
| EPI_ISL_9257481                                                                                                                                                                                                                                               | CH LANDERNEAU                                                                                            | laboratoire de Virologie CHRU Brest                                                                                                                                                                                | Adissa Tran Minoui; Christopher Payan; LÃ©a PilorgÃ©; Pauline Bargain; Simon Rambaut; Sophie Vallet                                                                                                                                                                                                                |
| EPI_ISL_8775395, EPI_ISL_9143422, EPI_ISL_9327723                                                                                                                                                                                                             | CHU BORDEAUX                                                                                             | CHU BORDEAUX                                                                                                                                                                                                       | AgnÃ¨s George-Walryck; Laurent Busson; Marie-Edith Lafon; Pantxika Bellecave; Valentine Lesourd-Aubert                                                                                                                                                                                                             |
| EPI_ISL_9257476                                                                                                                                                                                                                                               | CHU BREST                                                                                                | laboratoire de Virologie CHRU Brest                                                                                                                                                                                | Adissa Tran Minoui; Christopher Payan; LÃ©a PilorgÃ©; Pauline Bargain; Simon Rambaut; Sophie Vallet                                                                                                                                                                                                                |
| EPI_ISL_8650046, EPI_ISL_9143583                                                                                                                                                                                                                              | CHU Pontchaillou                                                                                         | CHU Pontchaillou                                                                                                                                                                                                   | DE TAYRAC Marie; DENOUAL Florent; ETCHEVERRY Amandine; FEBREAU Christine; GALIBERT Marie Dominique; GROLHIER Claire; JAGLINE Steven; PRONIER Charlotte; QUENET Benjamin; SASI Mohamed; THIBAUT Vincent                                                                                                             |
| EPI_ISL_8811771                                                                                                                                                                                                                                               | CLINIQUE ESQUIROL-ST HILAIRE                                                                             | CNR Virus des Infections Respiratoires - France SUD                                                                                                                                                                | Antonin Bal; Bruno Lina; Bruno Simon; Gregory Destras; Gwendolyne Burfin; Hadrien Regue; Laurence Josset; Martine Valette; Quentin Semanas; ThÃ©ophile Boyer                                                                                                                                                       |
| EPI_ISL_8812650, EPI_ISL_9319595, EPI_ISL_9322517                                                                                                                                                                                                             | CNR Virus des Infections Respiratoires - France SUD                                                      | CNR Virus des Infections Respiratoires - France SUD                                                                                                                                                                | Antonin Bal; Bruno Lina; Bruno Simon; Gregory Destras; Gwendolyne Burfin; Hadrien Regue; Laurence Josset; Martine Valette; Quentin Semanas; ThÃ©ophile Boyer                                                                                                                                                       |
| EPI_ISL_8546780                                                                                                                                                                                                                                               | Cedibio Unilabs site Oustalou                                                                            | Laboratoire Cerba                                                                                                                                                                                                  | BÃ©nÃ©dicte Roquebert; Laura Verdurme; Mathilde Roussel; Sabine Trombert-Paolantoni; StÃ©phanie Haim-Boukobza                                                                                                                                                                                                      |
| EPI_ISL_9229991, EPI_ISL_9229994                                                                                                                                                                                                                              | Centre Hospitalier Eure Seine                                                                            | Centre Hospitalier Universitaire de Rouen Laboratoire de Virologie                                                                                                                                                 | Alice Moisan; Fabienne De Oliveira; Marie Leoz                                                                                                                                                                                                                                                                     |
| EPI_ISL_9324954                                                                                                                                                                                                                                               | Centre Hospitalier Universitaire Clermont-Ferrand                                                        | CHU Clermont-Ferrand, service de virologie                                                                                                                                                                         | Bisseux Maxime; Combes Patricia; Henquell Cecile; Mirand Audrey                                                                                                                                                                                                                                                    |
| EPI_ISL_9125803, EPI_ISL_9229992                                                                                                                                                                                                                              | Centre Hospitalier Universitaire de Rouen Laboratoire de Virologie                                       | Centre Hospitalier Universitaire de Rouen Laboratoire de Virologie                                                                                                                                                 | Alice Moisan; Fabienne De Oliveira; Marie Leoz                                                                                                                                                                                                                                                                     |
| EPI_ISL_9224306                                                                                                                                                                                                                                               | Clinical Microbiology Laboratory, Tel Aviv Sourasky Medical Center                                       | Clinical Microbiology Laboratory, Tel Aviv Sourasky Medical Center                                                                                                                                                 | Alon Ziv; Amos Adler; Goel Morad; Katya Levytskyi; Lior Handler; Matan Slutzkin; Ora Halutz                                                                                                                                                                                                                        |
| EPI_ISL_8583114, EPI_ISL_8885715, EPI_ISL_8885734, EPI_ISL_8886189, EPI_ISL_8886681, EPI_ISL_9065834, EPI_ISL_9065993                                                                                                                                         | see above                                                                                                | Department of Bacteria, Parasites and Fungi, Statens Serum Institut, Copenhagen, Denmark                                                                                                                           | Danish Covid-19 Genome Consortium                                                                                                                                                                                                                                                                                  |
| EPI_ISL_8529812                                                                                                                                                                                                                                               | Department of Clinical Microbiology and Center for Genomic Medicine, Rigshospitalet, Copenhagen, Denmark | Statens Serum Institut Bioinformatics and Microbial Genomics                                                                                                                                                       | Danish Covid-19 Genome Consortium                                                                                                                                                                                                                                                                                  |
| EPI_ISL_8799570                                                                                                                                                                                                                                               | Dhulikhel Hospital, Kathmandu University Hospital                                                        | Molecular and Genomics Research Lab, Dhulikhel Hospital, Kathmandu University Hospital                                                                                                                             | Dipesh Tamrakar; Nishan Katuwal; Rajeev Shrestha; Surendra Kumar Madhup                                                                                                                                                                                                                                            |
| EPI_ISL_9368552                                                                                                                                                                                                                                               | EspaceBio Laboratoire                                                                                    | Department of Virology, Henri Mondor University Hospital, Assistance Publique HÃ´pitaux de Paris, UniversitÃ© Paris-Est CrÃ©teil, INSERM U955                                                                      | Alexandre Soulier; Christophe Rodriguez; Elisabeth Trawinski; Guillaume Gricourt; Jean-Michel Pawlowsky; Melissa N'Debi; Slim Fourati; Vanessa Demontant                                                                                                                                                           |
| EPI_ISL_8790968, EPI_ISL_8931987, EPI_ISL_9340728, EPI_ISL_9357153, EPI_ISL_9357168, EPI_ISL_9357216, EPI_ISL_9357219, EPI_ISL_9357239, EPI_ISL_9357246, EPI_ISL_9357269, EPI_ISL_9357332, EPI_ISL_9357339, EPI_ISL_9357378, EPI_ISL_9357379, EPI_ISL_9357386 | see above                                                                                                | Department of Virology, Henri Mondor University Hospital, Assistance Publique HÃ´pitaux de Paris, UniversitÃ© Paris-Est CrÃ©teil, INSERM U955                                                                      | Alexandre Soulier; Christophe Rodriguez; Elisabeth Trawinski; Guillaume Gricourt; Jean-Michel Pawlowsky; Melissa N'Debi; Slim Fourati; Vanessa Demontant                                                                                                                                                           |
| EPI_ISL_8830436                                                                                                                                                                                                                                               | GenePath, Pune                                                                                           | RF-IISER Pune                                                                                                                                                                                                      | Aurnab Ghose; Joy Merwin Monteiro; Krishanpal Karmodiya; Nikhil Phadke; Shatakshi Ranade                                                                                                                                                                                                                           |
| EPI_ISL_8799967                                                                                                                                                                                                                                               | Genoxa Sp. z o.o.                                                                                        | 1. Tricity SARS-CoV-2 sequencing consortium: University of Gdansk, Medical University of Gdansk, Vaxican Ltd., Invicta Ltd. 2. National Institute of Public Health - National Institute of Hygiene, Warsaw, Poland | Celina Cybulska; Karolina Gackowska; Katarzyna Groth; Katarzyna Zacharczuk; Krystyna Bienkowska Szewczyk; Lukasz Rabalski; Maciej Grzybek; Maciej Kosinski; Magdalena Nowakowska; Marcin Lubocki; Małgorzata Sadkowska-Todys; Tomasz Wolkowski                                                                     |
| EPI_ISL_9388817                                                                                                                                                                                                                                               | Hopital                                                                                                  | National Reference Center for Viruses of Respiratory Infections, Institut Pasteur, Paris                                                                                                                           | Angela Brisebarre; Camille Capel; Christophe Malabat; Corinne Maufrais; Etienne Simon-Lorière; Frédéric Lemoine; Julien Fumey; Louise Lefrançois; Marine DESROCHES; Marion Barbet; Maud Vanpeene; Méline Bizard; Slim El Khiairi; Sylvie Behillil; Sylvie Van der Werf; Vincent Enouf                              |
| EPI_ISL_9357425                                                                                                                                                                                                                                               | Hôpital Robert Schuman-Laboratoire                                                                       | Department of Virology, Henri Mondor University Hospital, Assistance Publique HÃ´pitaux de Paris, UniversitÃ© Paris-Est CrÃ©teil, INSERM U955                                                                      | Alexandre Soulier; Christophe Rodriguez; Elisabeth Trawinski; Guillaume Gricourt; Jean-Michel Pawlowsky; Melissa N'Debi; Slim Fourati; Vanessa Demontant                                                                                                                                                           |
| EPI_ISL_9161106, EPI_ISL_9184187, EPI_ISL_9184306                                                                                                                                                                                                             | IHU Mediterranee Infection                                                                               | IHU Mediterranee Infection                                                                                                                                                                                         | Philippe Colson; Philippe Colson et al.; et al.                                                                                                                                                                                                                                                                    |
| EPI_ISL_8672729, EPI_ISL_8812264, EPI_ISL_9322029                                                                                                                                                                                                             | INSTITUT BERGONIE                                                                                        | CNR Virus des Infections Respiratoires - France SUD                                                                                                                                                                | Antonin Bal; Bruno Lina; Bruno Simon; Gregory Destras; Gwendolyne Burfin; Hadrien Regue; Laurence Josset; Martine Valette; Quentin Semanas; ThÃ©ophile Boyer                                                                                                                                                       |
| EPI_ISL_8670699                                                                                                                                                                                                                                               | LABM CH MONTAUBAN                                                                                        | CNR Virus des Infections Respiratoires - France SUD                                                                                                                                                                | Antonin Bal; Bruno Lina; Bruno Simon; Gregory Destras; Gwendolyne Burfin; Hadrien Regue; Laurence Josset; Martine Valette; Quentin Semanas; ThÃ©ophile Boyer                                                                                                                                                       |
| EPI_ISL_9320433                                                                                                                                                                                                                                               | LABOFFICE                                                                                                | CNR Virus des Infections Respiratoires - France SUD                                                                                                                                                                | Antonin Bal; Bruno Lina; Bruno Simon; Gregory Destras; Gwendolyne Burfin; Hadrien Regue; Laurence Josset; Martine Valette; Quentin Semanas; ThÃ©ophile Boyer                                                                                                                                                       |
| EPI_ISL_9322159, EPI_ISL_9322192, EPI_ISL_9322206, EPI_ISL_9322234                                                                                                                                                                                            | LABORATOIRE CREAVALLEE                                                                                   | CNR Virus des Infections Respiratoires - France SUD                                                                                                                                                                | Antonin Bal; Bruno Lina; Bruno Simon; Gregory Destras; Gwendolyne Burfin; Hadrien Regue; Laurence Josset; Martine Valette; Quentin Semanas; ThÃ©ophile Boyer                                                                                                                                                       |
| EPI_ISL_8221909, EPI_ISL_8678535                                                                                                                                                                                                                              | LADR Zentrallabor DR. Kramer & Kollegen Geesthacht                                                       | Robert Koch Institute                                                                                                                                                                                              | Antonin Bal; Bruno Lina; Bruno Simon; Gregory Destras; Gwendolyne Burfin; Hadrien Regue; Laurence Josset; Martine Valette; Quentin Semanas; ThÃ©ophile Boyer                                                                                                                                                       |
| EPI_ISL_9321566                                                                                                                                                                                                                                               | LAM BIO 86 SITE DE CHAUMONT                                                                              | CNR Virus des Infections Respiratoires - France SUD                                                                                                                                                                | Antonin Bal; Bruno Lina; Bruno Simon; Gregory Destras; Gwendolyne Burfin; Hadrien Regue; Laurence Josset; Martine Valette; Quentin Semanas; ThÃ©ophile Boyer                                                                                                                                                       |
| EPI_ISL_8786663, EPI_ISL_8812423, EPI_ISL_9320821                                                                                                                                                                                                             | LAM BIOPOLE ORTHEZ                                                                                       | CNR Virus des Infections Respiratoires - France SUD                                                                                                                                                                | Antonin Bal; Bruno Lina; Bruno Simon; Gregory Destras; Gwendolyne Burfin; Hadrien Regue; Laurence Josset; Martine Valette; Quentin Semanas; ThÃ©ophile Boyer                                                                                                                                                       |
| EPI_ISL_7701131                                                                                                                                                                                                                                               | LANCET LABORATORY                                                                                        | National Institute for Communicable Diseases of the National Health Laboratory Service                                                                                                                             | Amoako DG; Bhiman JN; Everatt J; Ismail A; Kekana D; Mahlangu B; Mnguni A; Mohale T; Ntuli N; Scheepers C; Wolter N                                                                                                                                                                                                |
| EPI_ISL_9320734                                                                                                                                                                                                                                               | LBM BIOPOLE IDRON                                                                                        | CNR Virus des Infections Respiratoires - France SUD                                                                                                                                                                | Antonin Bal; Bruno Lina; Bruno Simon; Gregory Destras; Gwendolyne Burfin; Hadrien Regue; Laurence Josset; Martine Valette; Quentin Semanas; ThÃ©ophile Boyer                                                                                                                                                       |
| EPI_ISL_9319444                                                                                                                                                                                                                                               | LBM CHARENTE-MARITIME NORD                                                                               | CNR Virus des Infections Respiratoires - France SUD                                                                                                                                                                | Antonin Bal; Bruno Lina; Bruno Simon; Gregory Destras; Gwendolyne Burfin; Hadrien Regue; Laurence Josset; Martine Valette; Quentin Semanas; ThÃ©ophile Boyer                                                                                                                                                       |
| EPI_ISL_8789869, EPI_ISL_9245687                                                                                                                                                                                                                              | Labo Analyses Med                                                                                        | National Reference Center for Viruses of Respiratory Infections, Institut Pasteur, Paris                                                                                                                           | Angela Brisebarre; Brieuc GESTIN; Camille Capel; Christophe Malabat; Corinne Maufrais; Etienne Simon-Lorière; Frédéric Lemoine; Julien Fumey; Louise Lefrançois; Marion Barbet; Maud Vanpeene; Méline Bizard; Slim El Khiairi; Sylvie Behillil; Sylvie Van der Werf; Vincent Enouf; XAVIER GUETTIER                |
| EPI_ISL_9181702                                                                                                                                                                                                                                               | Laboratoire national de sante, Microbiologie, Virology                                                   | Laboratoire national de sante, Microbiology, Microbial Genomics Platform                                                                                                                                           | Anke Wiencke-Baldacchino; Catherine Ragimbeau; Elodie Solarino; Fatu Djabi; Jessica Tapp; Lise Pignon; Raoul Salmon; Sibel Berger; Tamir Abdelrahman; Trung Nguyen Nguyen; Virginie Jover                                                                                                                          |
| EPI_ISL_8925410                                                                                                                                                                                                                                               | Laboratory Diagnostyki i Medycznej                                                                       | Wojewódzka Stacja Sanitarno-Epidemiologiczna w Gdańsku                                                                                                                                                             | Barbara Skórczewska; Gabriela Rutkowska; Karolina Smarzyńska                                                                                                                                                                                                                                                       |
| EPI_ISL_9071293                                                                                                                                                                                                                                               | Lighthouse Lab in Alderley Park                                                                          | Wellcome Sanger Institute for the COVID-19 Genomics UK (COG-UK) Consortium                                                                                                                                         | Cordelia Langford; David K. Jackson; Dominic Kwiatkowski; Ewan Harrison; Ian Johnston; Jacquelyn Wynn; Jeffrey Barrett; John Sillitoe on behalf of the Wellcome Sanger Institute COVID-19 Surveillance Team; Mairead Hyland; Roberto Amato; Sonia Goncalves; The Lighthouse Lab in Alderley Park and Alex Alderton |
| EPI_ISL_7806100, EPI_ISL_8320302, EPI_ISL_8549025, EPI_ISL_8549339, EPI_ISL_8709900, EPI_ISL_9479322, EPI_ISL_9479323, EPI_ISL_9479324                                                                                                                        | see above                                                                                                | MEPHI, Aix Marseille University                                                                                                                                                                                    | Anthony LEVASSEUR; Anthony Levasseur                                                                                                                                                                                                                                                                               |
| EPI_ISL_8770504                                                                                                                                                                                                                                               | National Public Health Laboratory, National Centre for Infectious Diseases                               | National Public Health Laboratory, National Centre for Infectious Diseases                                                                                                                                         | Benny Yeo; Lin Cui; Raymond Tzer Pin Lin; Royce Ang; Samuel Loo; Zhenyang Zhou                                                                                                                                                                                                                                     |
| EPI_ISL_7605591, EPI_ISL_8801153                                                                                                                                                                                                                              | ROB FERREIRA LABORATORY                                                                                  | National Institute for Communicable Diseases of the National Health Laboratory Service                                                                                                                             | Amoako DG; Bhiman JN; Everatt J; Ismail A; Kekana D; Mahlangu B; Mnguni A; Mohale T; Ntuli N; Scheepers C; Wolter N                                                                                                                                                                                                |
| EPI_ISL_9322301, EPI_ISL_9322322                                                                                                                                                                                                                              | SYNLAB AQUITAINE LABO MERLEN                                                                             | CNR Virus des Infections Respiratoires - France SUD                                                                                                                                                                | Antonin Bal; Bruno Lina; Bruno Simon; Gregory Destras; Gwendolyne Burfin; Hadrien Regue; Laurence Josset; Martine Valette; Quentin Semanas; ThÃ©ophile Boyer                                                                                                                                                       |
| EPI_ISL_7605589, EPI_ISL_8799186                                                                                                                                                                                                                              | TSPHONG LABORATORY                                                                                       | National Institute for Communicable Diseases of the National Health Laboratory Service                                                                                                                             | Amoako DG; Bhiman JN; Everatt J; Ismail A; Kekana D; Mahlangu B; Mnguni A; Mohale T; Ntuli N; Scheepers C; Wolter N                                                                                                                                                                                                |
| EPI_ISL_8799246                                                                                                                                                                                                                                               | VERMAAK                                                                                                  | National Institute for Communicable Diseases of the National Health Laboratory Service                                                                                                                             | Amoako DG; Bhiman JN; Everatt J; Ismail A; Kekana D; Mahlangu B; Mnguni A; Mohale T; Ntuli N; Scheepers C; Wolter N                                                                                                                                                                                                |
| EPI_ISL_8128502                                                                                                                                                                                                                                               | ZARV/NHLS, Department Medical Virology, University of Pretoria                                           | CERI, Centre for Epidemic Response and Innoavtion, Stellenbosch University and KRISP, KZN Research Innovation and Sequencing Platform, UKZN.                                                                       | Adriano Mendes; Amy Strydom; Arisha Mahara; Giandhari J; Micheala Davids; Naidoo Y; Pillay S; Ramphal U; Ramphal Y; San JE; Sim Mayaphi and Marietjie Venter; Tegally H; Tshibulula D; Wilkinson E; de Oliveira T                                                                                                  |
